# Supplementary material
Source: MDPI journal article supplement (https://www.mdpi.com/2079-6412/12/12/1927)
Supplement: s1 [file s1]

# A Two-dimensional Guidance Strategy to Fabricate Perovskite Gadolinium Aluminate Ceramic Film

Tao Zhang <sup>1</sup> Lu Chen <sup>2</sup>, Jing Yao <sup>2</sup> and Qi Zhu <sup>2,\*</sup>

<sup>1</sup> Shenyang National Laboratory for Materials Science, Northeastern University, 3-11 Wenhua Road, Shenyang 110819, China

<sup>2</sup> Key Laboratory for Anisotropy and Texture of Materials (Ministry of Education), School of Materials Science and Engineering, Northeastern University, Shenyang, Liaoning 110819, China

\* Correspondence: zhuq@smm.neu.edu.cn; Tel.: +86-24-8367-2700

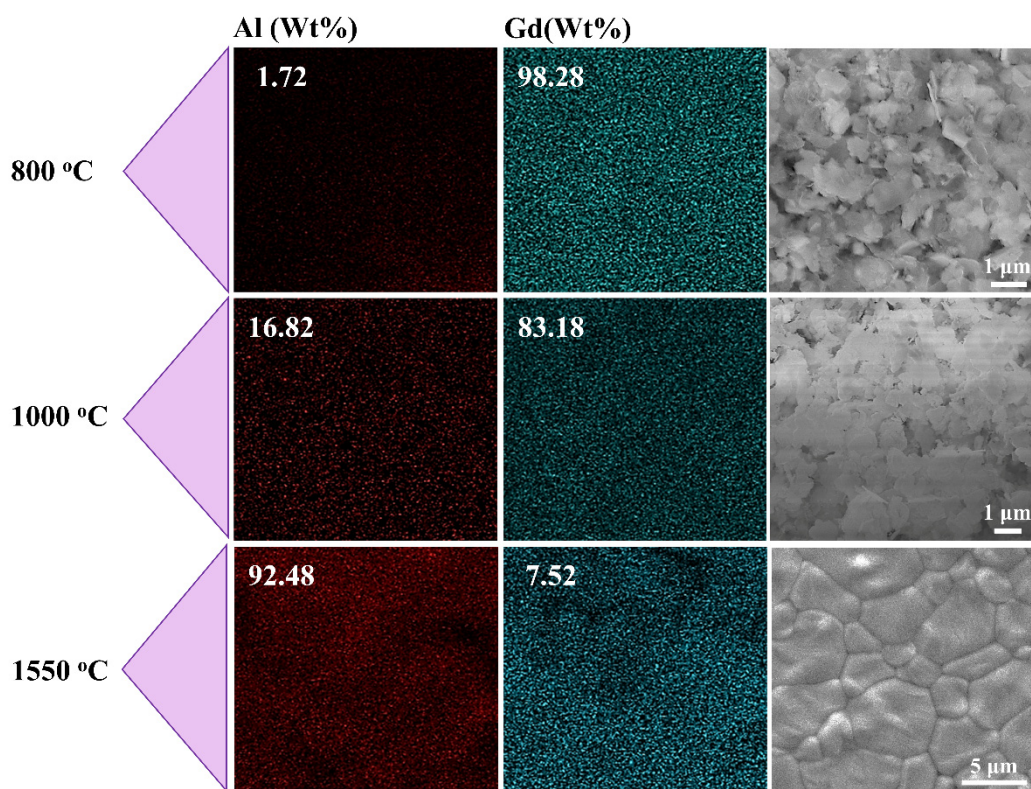

**Figure S1.** EDS elemental mapping analysis of the film calcined at different temperatures.

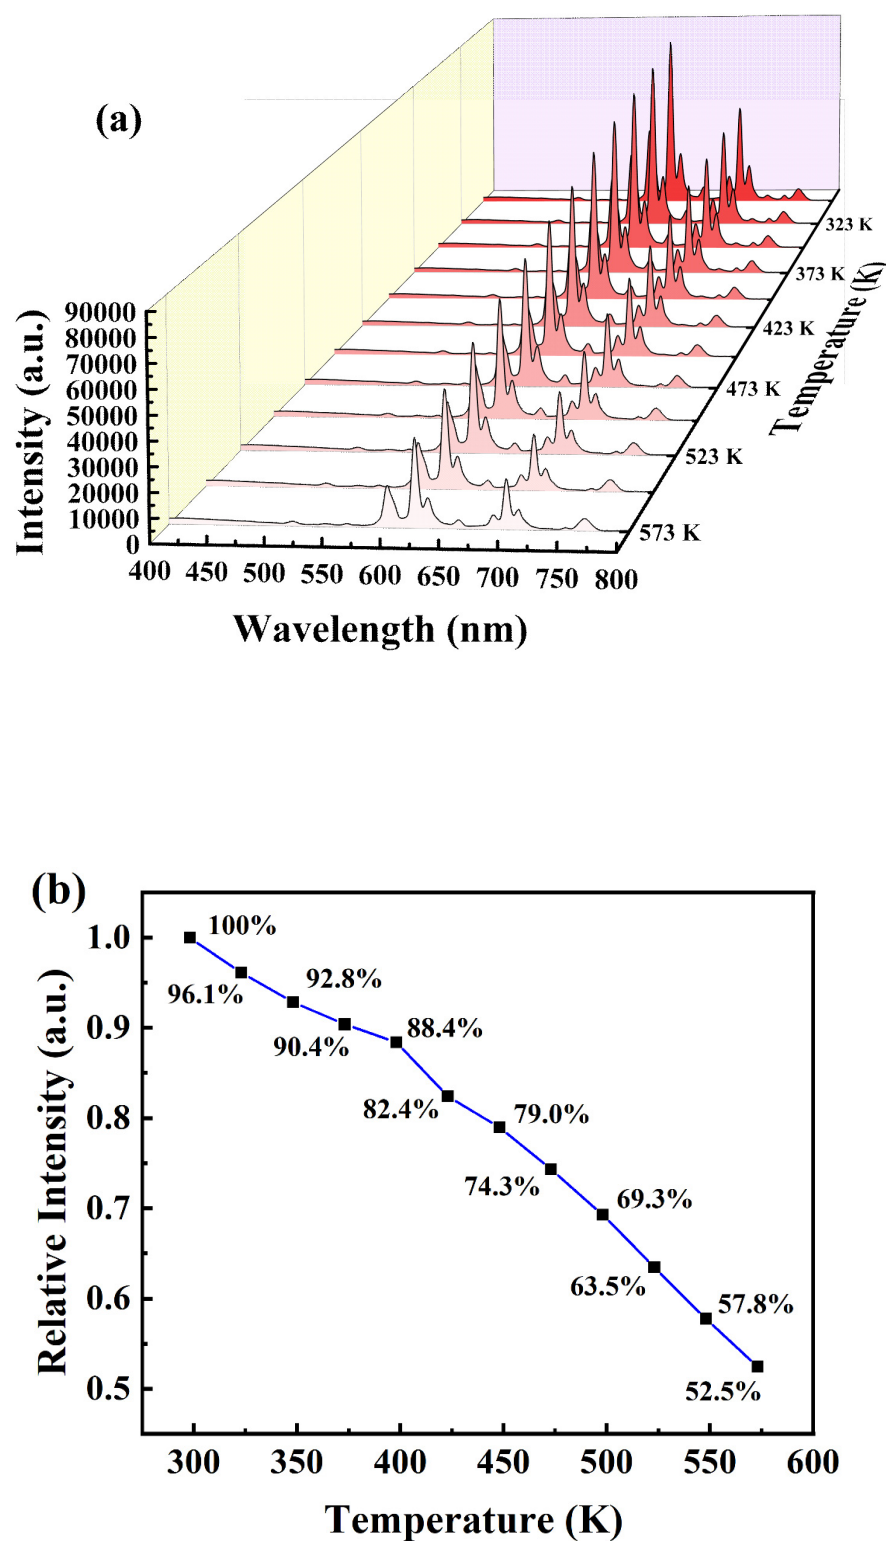

**Figure S2.** (a) Temperature-dependent PL spectra and (b) relative integral intensity of 618-nm emission bands.
